# Supplementary material for: ω-3 PUFAs ameliorate liver fibrosis and inhibit hepatic stellate cells proliferation and activation by promoting YAP/TAZ degradation
Source: PubMed Central journal article supplement (PMC4951777; doi:10.1038/srep30029), 2016-07-20
Supplement: srep30029-s1.pdf [file srep30029-s1.pdf]

**$\omega$ -3 PUFAs ameliorate liver fibrosis and inhibit hepatic stellate cells proliferation and activation by promoting YAP/TAZ degradation**

Kun Zhang<sup>1,\*</sup>, Yanan Chang<sup>1,\*</sup>, Zhemin Shi<sup>1,\*</sup>, Xiaohui Han<sup>1</sup>, Yawei Han<sup>1</sup>, Qingbin Yao<sup>1</sup>,

Zhimei Hu<sup>1</sup>, Hongmei Cui<sup>1</sup>, Lina Zheng<sup>1</sup>, Tao Han<sup>2,3,4</sup>&Wei Hong<sup>1</sup>

<sup>1</sup>Department of Histology and Embryology, School of Basic Medical Sciences, Tianjin Medical University, Tianjin 300070, China

<sup>2</sup>The Third Central Clinical College of Tianjin Medical University, Tianjin 300170, China

<sup>3</sup>Department of Hepatology, Tianjin Third Central Hospital, Tianjin 300170, China

<sup>4</sup>Tianjin Key Laboratory of Artificial Cells, Tianjin 300170, China

\*These authors contributed equally to this work.

Correspondence and requests for materials should be addressed to T.H. (email: jichu022@tmu.edu.cn)

or W.H. (email: hongwei@tmu.edu.cn)

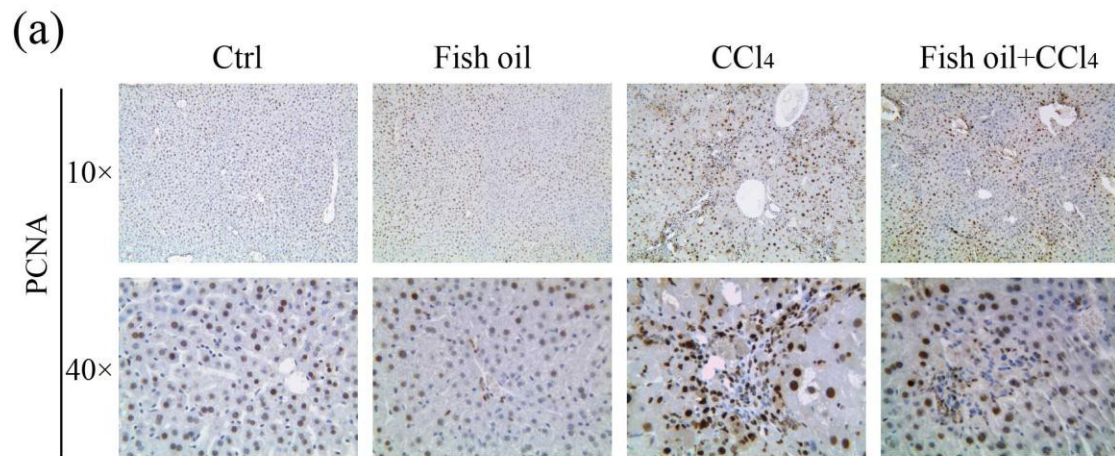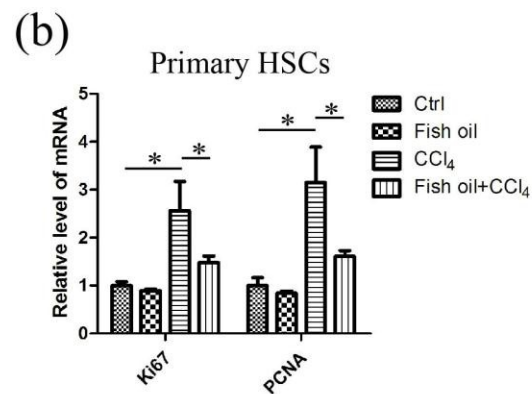

**Supplemental Fig. 1.  $\omega$ -3 PUFAs inhibit the proliferation of activated hepatic stellate cells *in vivo*.**

(a) Liver sections from mice of the indicated group were immunostained with anti-PCNA antibody. (b) Total RNA from HSCs immediately isolated from liver tissues in control, fish oil, CCl<sub>4</sub> and fish oil/CCl<sub>4</sub> mice was extracted and subsequently used for the detection of the mRNA of *Ki67* and *PCNA* by real-time PCR analysis. Data presented are mean  $\pm$  SEM for triplicate experiments. \* $P < 0.05$ .

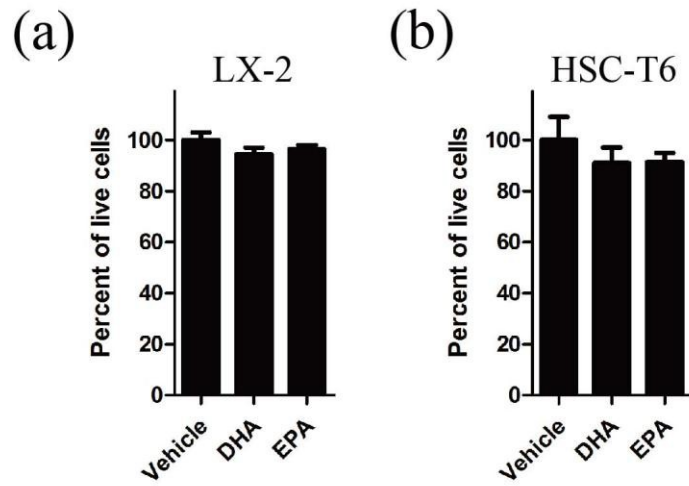

**Supplemental Fig. 2. DHA and EPA exhibit no cytotoxic effect on LX-2 and HSC-T6 cells.** (a, b) LX-2 (a) and HSC-T6 (b) cells growing in medium were treated with 100  $\mu$ M either DHA or EPA, respectively, for 6 h and subsequently trypan blue staining was performed. The cell numbers were counted to measure the viability. Treatment with ethanol was used as a vehicle control. Data presented are mean  $\pm$  SEM for triplicate experiments.

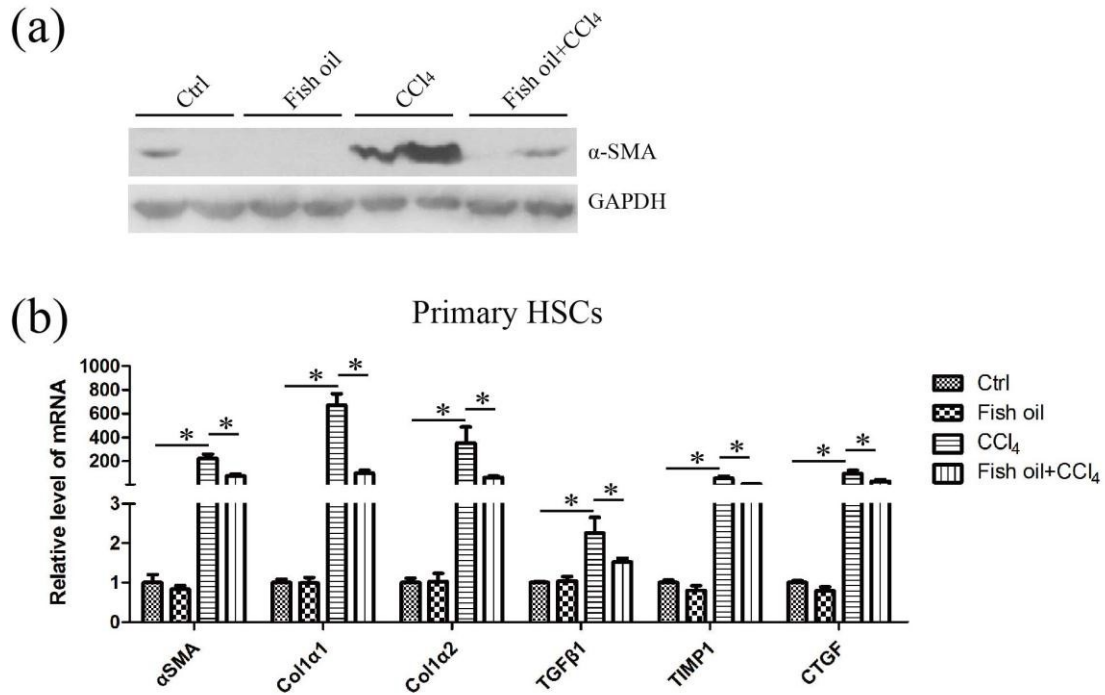

**Supplemental Fig. 3. Fish oil down-regulates the expression of fibrogenic genes *in vivo*.** (a) Total protein of HSCs immediately isolated from liver tissues in control, fish oil, CCl<sub>4</sub> and fish oil/CCl<sub>4</sub> mice was extracted and used for detecting  $\alpha$ -SMA by western blot. GAPDH served as the loading control. The gels were cropped and the full-length gels are presented in Supplementary Fig. 5. (b) Total RNA of HSCs immediately isolated from liver tissues in control, fish oil, CCl<sub>4</sub> and fish oil/CCl<sub>4</sub> mice was extracted and used for detection of the fibrogenic genes, including  *$\alpha$ -SMA*, *colla1*, *colla2*, *tgf- $\beta$ 1*, *timp1* and *ctgf* by real-time PCR. The data are expressed as the mean  $\pm$  SEM for triplicate experiments. \**P*<0.05.

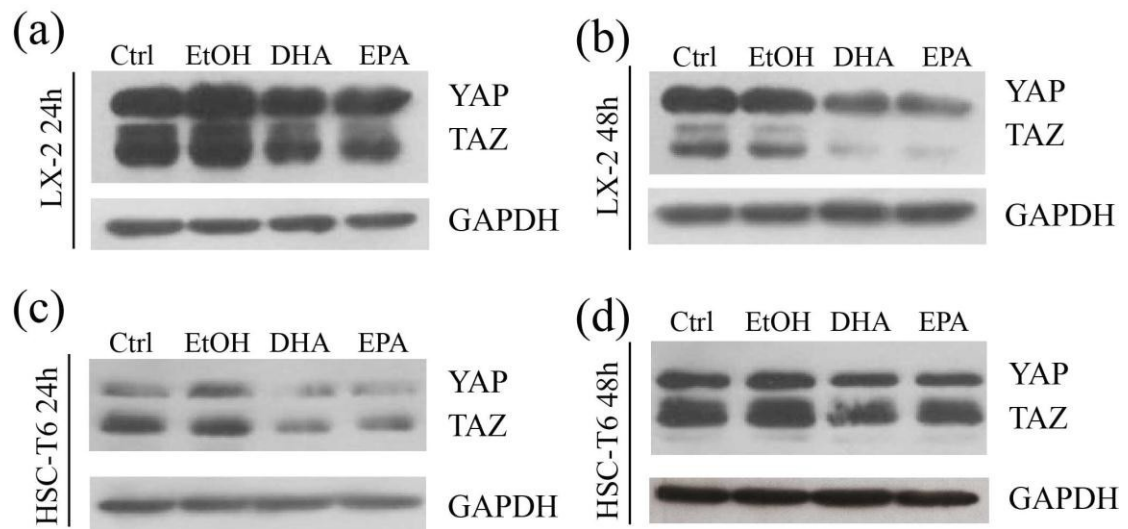

**Supplemental Fig. 4. DHA and EPA decrease the protein level of YAP/TAZ in LX-2 and HSC-T6 cell lines.** (a-d) LX-2 (a, b) and HSC-T6 (c, d) cells were exposed for 24 or 48 h to media containing 10% fetal bovine serum, ethanol, 75 μM DHA or EPA. Cell lysates from both cell lines were subsequently assessed by immunoblot to determine the protein levels of YAP/TAZ. GAPDH was used as internal control. The gels were cropped and the full-length gels are presented in Supplementary Fig. 6. The data are expressed as the mean ± SEM for triplicate experiments. \* $P < 0.05$ .

Fig. 1b

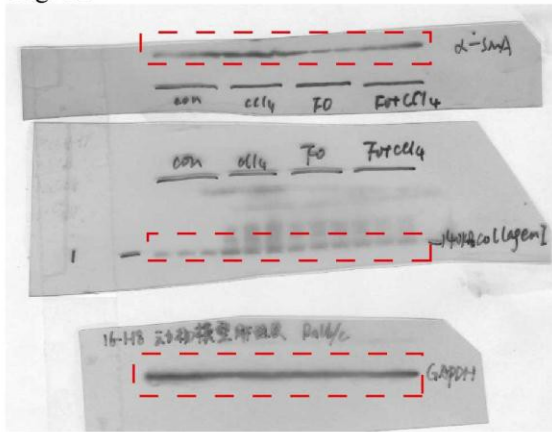

Fig. 3e-h

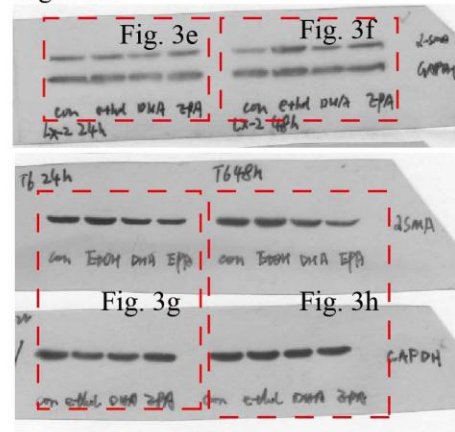

Fig. S2a

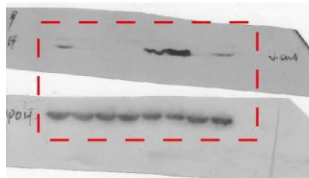

Fig. 5a

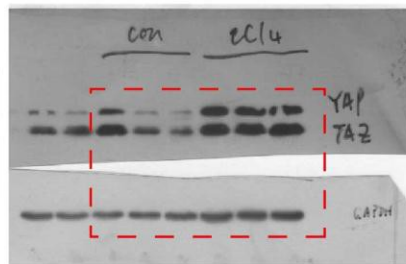

Fig. 5f

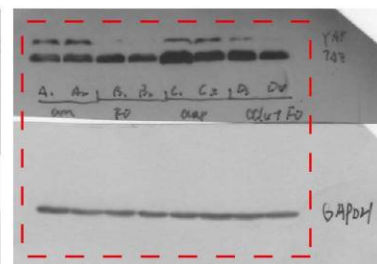

Supplemental Fig. 5. Uncropped, unprocessed images of blots and gels.

Fig. 6a,b and Fig. S3a,b

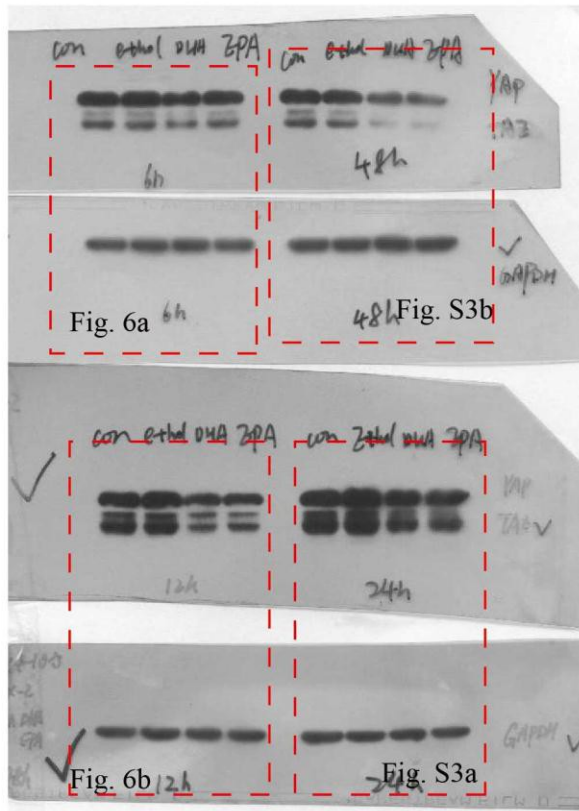

Fig. 6c and Fig. S3c

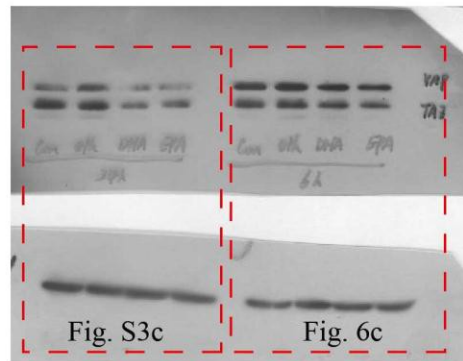

Fig. 6d

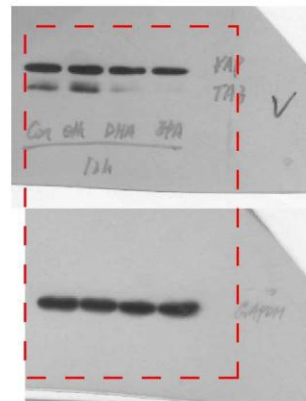

Fig. S3d

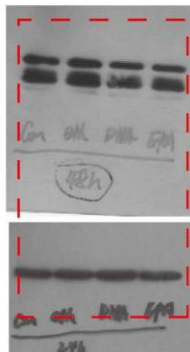

Fig. 7b

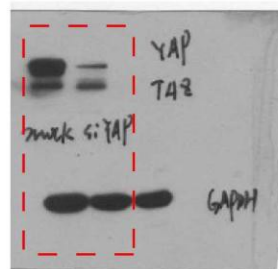

Supplemental Fig. 6. Uncropped, unprocessed images of blots and gels.

Fig. 8a

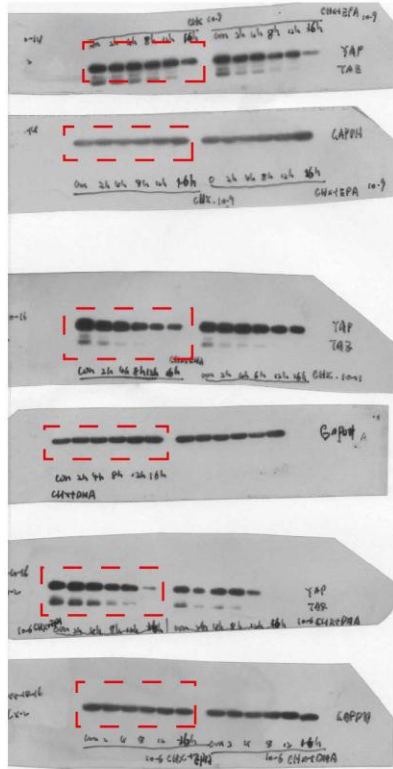

Fig. 8b

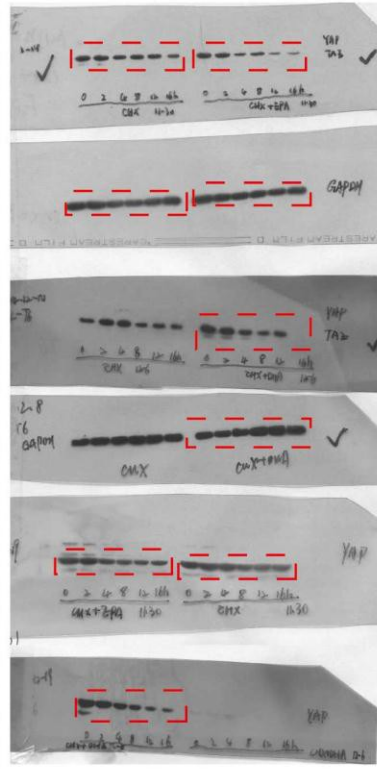

Fig. 8c

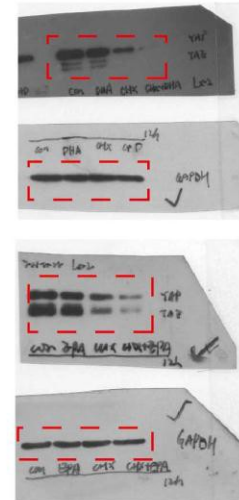

Fig. 8e

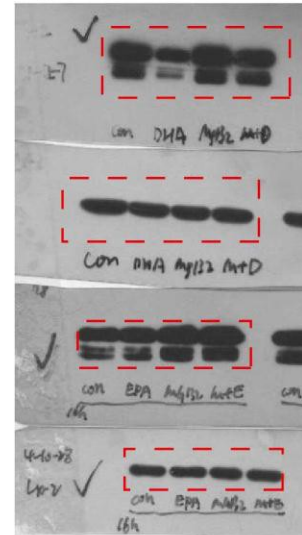

Fig. 8d

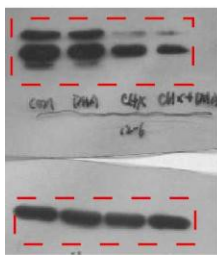

Fig. 8d and 8f

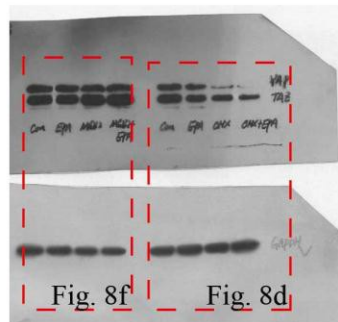

Fig. 8f

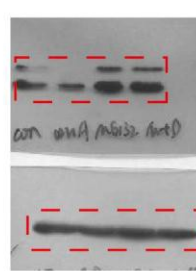

Supplemental Fig. 7. Uncropped, unprocessed images of blots and gels.



**Supplemental Tab.1. Mouse liver tissue fatty acid composition in the four groups (weight % of total fatty acids)**

| PUFA           | Control   | Fish oil     | CCl <sub>4</sub> | Fish oil + CCl <sub>4</sub> |
|----------------|-----------|--------------|------------------|-----------------------------|
| LNA (18:2 n-6) | 9.34±0.98 | 3.75±1.64*   | 8.92±0.92        | 4.13±1.38 <sup>#</sup>      |
| AA (20:4 n-6)  | 7.28±1.22 | 4.36±0.68*   | 6.49±0.96        | 3.28±0.56 <sup>#</sup>      |
| DTA (22:4 n-6) | 0.19±0.05 | 0.09±0.02*   | 0.20±0.02        | 0.04±0.03 <sup>#</sup>      |
| EPA (20:5 n-3) | 0.33±0.08 | 1.09±0.18**  | 0.49±0.14        | 0.93±0.12 <sup>#</sup>      |
| DPA (22:5 n-3) | 0.24±0.05 | 0.98±0.12**  | 0.23±0.06        | 1.12±0.15 <sup>#</sup>      |
| DHA (22:6 n-3) | 3.28±1.13 | 12.35±1.48** | 4.32±0.87        | 13.65±2.17 <sup>#</sup>     |

Values are means ± SEM, n=5 mice per group. <sup>\*</sup>/<sup>#</sup>*p*<0.05, <sup>\*\*</sup>/<sup>##</sup>*p*<0.01. <sup>\*</sup>*p*<0.05 compared with control group. <sup>#</sup>*p*<0.05 compared with CCl<sub>4</sub> group. We used analysis of variance (ANOVA) test among groups and Student's *t* test between two groups. All statistical analyses were performed using SPSS version 13.0 software and *p*<0.05 indicated statistical significance.

**Supplemental Tab.2. Serum levels of ALT, AST**

| Group                            | ALT (U/L)               | AST (U/L)             |
|----------------------------------|-------------------------|-----------------------|
| Control group                    | 28.3±7.1                | 37.4±8.2              |
| Fish oil group                   | 27.5±10.1               | 33.7±11.4             |
| CCl <sub>4</sub> group           | 258.3±47.2*             | 281.6±65.3*           |
| CCl <sub>4</sub> +fish oil group | 128.3±31.5 <sup>#</sup> | 103±43.8 <sup>#</sup> |

Values are means ± SEM, n=5 mice per group. \* $p < 0.05$  compared with control group. <sup>#</sup> $p < 0.05$  compared with CCl<sub>4</sub> group. We used analysis of variance (ANOVA) test among groups and Student's *t* test between two groups. All statistical analyses were performed using SPSS version 13.0 software and  $p < 0.05$  indicated statistical significance.

**Supplemental Tab.3. The number of hepatic stellate cells in the liver of one Balb/c mouse**

| Number | Control                   | Fish oil                  | CCl <sub>4</sub>             | Fish oil + CCl <sub>4</sub>     |
|--------|---------------------------|---------------------------|------------------------------|---------------------------------|
| HSCs   | $(67 \pm 12) \times 10^5$ | $(62 \pm 18) \times 10^5$ | $(203 \pm 42) \times 10^5^*$ | $(136 \pm 27) \times 10^5^{\#}$ |

Values are means  $\pm$  SEM, n=3 mice per group. \* $p < 0.05$  compared with control group. # $p < 0.05$  compared with CCl<sub>4</sub> group. We used analysis of variance (ANOVA) test among groups and Student's *t* test between two groups. All statistical analyses were performed using SPSS version 13.0 software and  $p < 0.05$  indicated statistical significance.

**Supplemental Tab.4. The sequences of primers for real-time PCR**

| <b>Gene symbol</b>      | <b>Forward 5' - 3'</b>    | <b>Reverse 5' - 3'</b>   |
|-------------------------|---------------------------|--------------------------|
| $\beta$ -actin (mouse)  | ATGCCACAGGATTCCATACCCAAGA | CTCTAGACTTCGAGCAGGAGATGG |
| Col1 $\alpha$ 1 (mouse) | ATCGGTCATGCTCTCTCCAAACCA  | ACTGCAACATGGAGACAGGTCAGA |
| Col1 $\alpha$ 2 (mouse) | CCTTTGTCAGAATACTGAGCAGC   | GTAACCTCGTGCCTAGCAACA    |
| Col3 $\alpha$ 1 (mouse) | TGCTCCAGTTAGCCCTGCAA      | GGTCCTGCAGGCAACAGTGGTTC  |
| Col4 $\alpha$ 5 (mouse) | CTCCCTTACCGCCCTTTTCTC     | AGGCGAAATGGGTATGATGGG    |
| CTGF (mouse)            | ATCCAGGCAAGTGCATTGGTA     | GGGCCTCTTCTGCGATTC       |
| $\alpha$ -SMA (mouse)   | TCGGATACTTCAGCGTCAGGA     | GTCCCAGACATCAGGGAGTAA    |
| TIMP-1 (mouse)          | TCCGTCCACAAACAGTGAGTGTC   | GGTGTGCACAGTGTTTCCCTGTTT |
| Mmp2 (mouse)            | GTGTTCTTCGCAGGGAATGAG     | GATGCTTCCAAACTTCACGCT    |
| TGF- $\beta$ 1 (mouse)  | TGTGTTGGTTGTAGAGGGCAAGGA  | TTTGGAGCCTGGACACACAGTACA |
| YAP (mouse)             | CCACTGTTAAGAAAGGGATCGG    | CCCTGATGATGTACCACTGCC    |
| TAZ (mouse)             | TTACAGCCAGGTTAGAAAGGGCTC  | GAAAATCACCACATGGCAAGACCC |
| Ki67 (mouse)            | CATCCATCAGCCGGAGTCA       | TGTTTCGCAACTTTCGTTTGTG   |
| PCNA (mouse)            | TTGAGGCACGCCTGATCC        | GGAGACGTGAGACGAGTCCAT    |
| $\beta$ -actin (rat)    | CGCTCGGTCAGGATCTTC        | CGGCATTGTCACCAACTG       |
| Col1 $\alpha$ 1 (rat)   | ATCGGTCATGCTCTCTCCAAACCA  | ACTGCAACATGGAGACAGGTCAGA |
| Col1 $\alpha$ 2 (rat)   | CCTTTGTCAGAATACTGAGCAGC   | GTAACCTCGTGCCTAGCAACA    |
| Col3 $\alpha$ 1 (rat)   | TGCTCCAGTTAGCCCTGCAA      | GGTCCTGCAGGCAACAGTGGTTC  |
| Col4 $\alpha$ 5 (rat)   | CTCCCTTACCGCCCTTTTCTC     | AGGCGAAATGGGTATGATGGG    |
| CTGF (rat)              | CCGCCAACCGCAAGATT         | TCGGGAAGGGGCAGTCA        |
| $\alpha$ -SMA (rat)     | GATCACCTGCCCATCAGG        | TGTGCTGGACTCTGGAGATG     |
| TIMP-1 (rat)            | TCTGATCTGTCCACAAGCAAT     | TCCTGGTTCCCTGGCATAATC    |
| TGF- $\beta$ 1 (rat)    | AGGTGTTGAGCCCTTTCCAG      | CAAAGACATCACACACAGTA     |
| YAP (rat)               | TCGGTACTGGCCTGTGCGCA      | CGTGCCCATGAGGCTTCGCA     |
| TAZ (rat)               | GAGGAAGGGCTCGCTTTTGT      | ATGTTGACCTCGGGACTTTGG    |
| GAPDH (human)           | GGCATGGACTGTGGTCATGAG     | TGCACCACCAACTGCTTAGC     |
| Col1 $\alpha$ 1 (human) | TCCACATGCTTTATTCCAGCAATC  | CCCGGGTTTCAGAGACAACCTTC  |
| Col3 $\alpha$ 1 (human) | AGCCTTGCGTGTTTCGATAT      | GAAGATGTCCTTGATGTGC      |
| Col4 $\alpha$ 5 (human) | TTCAGCGTTTCTGACTGAGG      | AGAGCATCCAGCCATTCAAT     |
| CTGF (human)            | TGCTTTGAACGATCAGACAA      | CTTGTGGCAAGTGAATTTCC     |
| $\alpha$ -SMA (human)   | GCCATGTTCTATCGGGTACTTC    | CAGGGCTGTTTTCCCATCCAT    |
| Mmp2 (human)            | GTGTTCTTCGCAGGGAATGAG     | GATGCTTCCAAACTTCACGCT    |
| TGF- $\beta$ 1 (human)  | TGTTGGACAGCTGCTCCACCT     | GGCAGTGGTTGAGCCGTGGA     |
| YAP (human)             | CCAGGAATGGCTTCAAGGTA      | CTCGAACCCCAGATGACTTC     |
| TAZ (human)             | GTGATTACAGCCAGGTTAGAAAG   | CCATCACTAATAATAGCTCAGATC |
